# Supplementary material for: The serine synthesis pathway drives osteoclast differentiation through epigenetic regulation of NFATc1 expression
Source: PubMed Central journal article supplement (PMC10822776; doi:10.1038/s42255-023-00948-y), 2024-01-10
Supplement: 42255_2023_948_MOESM1_ESM.pdf [file 42255_2023_948_MOESM1_ESM.pdf]

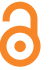

---

# The serine synthesis pathway drives osteoclast differentiation through epigenetic regulation of NFATc1 expression

---

In the format provided by the authors and unedited

**Supplementary Data Table 1. Phenotype of 8-week-old female *Phgdh*<sup>oc+</sup> and *Phgdh*<sup>oc-</sup> mice.**

|                          | <i>Phgdh</i> <sup>oc+</sup> | <i>Phgdh</i> <sup>oc-</sup> |
|--------------------------|-----------------------------|-----------------------------|
| Body weight (g)          | 19.3 ± 2.3                  | 17.8 ± 0.78                 |
| Tibia length (mm)        | 15.2 ± 1.8                  | 14.2 ± 1.4                  |
| BV/TV (%)                | 6.9 ± 1.6                   | 11.2 ± 2.4 *                |
| Tb.Th (µm)               | 40.5 ± 2.2                  | 44.3 ± 3.0 *                |
| Tb.N (1/µm)              | 0.0024 ± 0.0014             | 0.0034 ± 0.0021             |
| Tb.Sp (µm)               | 289.5 ± 40.6                | 237.6 ± 50.1                |
| Ct.Th (µm)               | 121.0 ± 10.1                | 136.5 ± 9.0 *               |
| Ec.Pm (mm)               | 5.9 ± 0.92                  | 5.2 ± 0.12 *                |
| Ma.Ar (mm <sup>2</sup> ) | 0.98 ± 0.11                 | 0.82 ± 0.14 *               |
| Ps.Pm (mm)               | 6.4 ± 0.77                  | 6.1 ± 0.27                  |
| Po (%)                   | 2.5 ± 0.58                  | 2.3 ± 0.90                  |

BV/TV:  $P=0.0018$ ; Tb.Th:  $P=0.020$ ; Ct.Th:  $P=0.008$ ; Ec.Pm:  $P=0.03$ ; Ma.Ar:  $P=0.042$  (unpaired, two-tailed Student's t-test with  $*p<0.05$  vs *Phgdh*<sup>oc+</sup>).

**Supplementary Data Table 2. Primer sequences for qRT-PCR.**

| Gene            | Forward (5'-3')                | Reverse (5'-3')                |
|-----------------|--------------------------------|--------------------------------|
| <i>Acp5</i>     | ACTTCCCCAGCCCTTACTACC          | TCAGCACATAGCCCACACCG           |
| <i>Atp6v0d2</i> | TCAGATCTCTTCAAGGCTGTGCTG       | GTGCCAAATGAGTTCAGAGTGATG       |
| <i>Bglap</i>    | GGCCCTGAGTCTGACAAAGC           | GCTCGTCACAAGCAGGGTTAA          |
| <i>CalcRec</i>  | AACCGAACCTGGTCCAACCTATACT      | TCAGCATGGAAGCAACCAAA           |
| <i>cMyc</i>     | GATTCCACGGCCTTCTCTC            | TCTTCTTGCTCTTCTTCAGAGTC        |
| <i>Col1a1</i>   | TGTCCCAACCCCAAGAC              | CCCTCGACTCCTACATCTTCTGA        |
| <i>Csfr1</i>    | GCAGTACCACCATCCACTTGTA         | GTGAGACACTGTCCTTCAGTGC         |
| <i>Ctsk</i>     | TGTGGACTGTGTGACTGAGAATTATG     | CCTTTGCCGTGGCGTTAT             |
| <i>Dcstamp</i>  | AAACTACGTGGAGAGAAGCAAGGA       | CAGAATAATACTGAGAGGAACCCAAGT    |
| <i>Got2</i>     | TGAAGTGTTGAAAAGCGGCCG          | TTGGGCAGAAAGACATCTCGG          |
| <i>Gpt</i>      | CTGAGGTTATCCGTGCCAATA          | CCGGACTGCTCAGAAGATTG           |
| <i>Hprt</i>     | TTATCAGACTGAAGAGCTACTGTAATGATC | TTACCAGTGTCAATTATATCTTCAACAATC |
| <i>Irf8</i>     | GGAAAGCCTTACCTGCTGAC           | AAGGTCACCGTGGTCCTTAG           |
| <i>Jmjd3</i>    | CAACTCCATCTGGCTGTTACTG         | CCTTCTGCAACCAATTCCAG           |
| <i>Mmp9</i>     | CCAAAGACCTGAAAACCTCCAA         | GTAGAGACTGCTTCTCTCCCATCAT      |
| <i>Nfatc1</i>   | CTCGAAAGACAGCACTGGAGCAT        | CGGCTGCCTTCCGTCTCATAG          |
| <i>Opg</i>      | GAAGGGCGTTACCTGGAGATC          | CTGAATTAGCAGGAGGCCAAAT         |
| <i>Phgdh</i>    | CGATGAAAGATGGCAAATGGG          | GCCACCTCTCTTCCAATTCT           |
| <i>Psat1</i>    | GCAGCTACTAGACTACAGAGGA         | GCTAGCAATTCCCTCACAAGA          |
| <i>Rank</i>     | GAGCTCAGCATCCCTTGCA            | CCCTGGTGTGCTTCTAGCTTTC         |
| <i>Rankl</i>    | CATTTGCACACCTCACCATCA          | TTGCTTAACGTCATGTTAGAGATCTTG    |
| <i>Runx2</i>    | TACCAGCCACCGAGACCAA            | AGAGGCTGTTTGACGCCATAG          |
| <i>Slc1a4</i>   | CAGTGGACTCTTTCCTCGATTT         | ATGGGTCACCACTGTGTAATC          |
| <i>Slc6a9</i>   | GGGAGGAGCCTTCATGTTC            | AGGAAAGCTCCATGAAGAAGAG         |
