# Supplementary material for: The serine synthesis pathway drives osteoclast differentiation through epigenetic regulation of NFATc1 expression
Source: PubMed Central journal article supplement (PMC10822776; doi:10.1038/s42255-023-00948-y), 2024-01-10
Supplement: 42255_2023_948_MOESM2_ESM.pdf [file 42255_2023_948_MOESM2_ESM.pdf]

## Reporting Summary

Nature Portfolio wishes to improve the reproducibility of the work that we publish. This form provides structure for consistency and transparency in reporting. For further information on Nature Portfolio policies, see our [Editorial Policies](#) and the [Editorial Policy Checklist](#).

### Statistics

For all statistical analyses, confirm that the following items are present in the figure legend, table legend, main text, or Methods section.

- | n/a                                 | Confirmed                                                                                                                                                                                                                                                                                      |
|-------------------------------------|------------------------------------------------------------------------------------------------------------------------------------------------------------------------------------------------------------------------------------------------------------------------------------------------|
| <input type="checkbox"/>            | <input checked="" type="checkbox"/> The exact sample size ( $n$ ) for each experimental group/condition, given as a discrete number and unit of measurement                                                                                                                                    |
| <input type="checkbox"/>            | <input checked="" type="checkbox"/> A statement on whether measurements were taken from distinct samples or whether the same sample was measured repeatedly                                                                                                                                    |
| <input type="checkbox"/>            | <input checked="" type="checkbox"/> The statistical test(s) used AND whether they are one- or two-sided<br><i>Only common tests should be described solely by name; describe more complex techniques in the Methods section.</i>                                                               |
| <input checked="" type="checkbox"/> | <input type="checkbox"/> A description of all covariates tested                                                                                                                                                                                                                                |
| <input type="checkbox"/>            | <input checked="" type="checkbox"/> A description of any assumptions or corrections, such as tests of normality and adjustment for multiple comparisons                                                                                                                                        |
| <input type="checkbox"/>            | <input checked="" type="checkbox"/> A full description of the statistical parameters including central tendency (e.g. means) or other basic estimates (e.g. regression coefficient) AND variation (e.g. standard deviation) or associated estimates of uncertainty (e.g. confidence intervals) |
| <input type="checkbox"/>            | <input checked="" type="checkbox"/> For null hypothesis testing, the test statistic (e.g. $F$ , $t$ , $r$ ) with confidence intervals, effect sizes, degrees of freedom and $P$ value noted<br><i>Give <math>P</math> values as exact values whenever suitable.</i>                            |
| <input checked="" type="checkbox"/> | <input type="checkbox"/> For Bayesian analysis, information on the choice of priors and Markov chain Monte Carlo settings                                                                                                                                                                      |
| <input checked="" type="checkbox"/> | <input type="checkbox"/> For hierarchical and complex designs, identification of the appropriate level for tests and full reporting of outcomes                                                                                                                                                |
| <input checked="" type="checkbox"/> | <input type="checkbox"/> Estimates of effect sizes (e.g. Cohen's $d$ , Pearson's $r$ ), indicating how they were calculated                                                                                                                                                                    |

*Our web collection on [statistics for biologists](#) contains articles on many of the points above.*

### Software and code

Policy information about [availability of computer code](#)

Data collection

qRT-PCR: StepOne Real-Time PCR software v2.3  
 13C tracing: Xcalibur v4.3  
 imaging: Zeiss AxioVision 4.9.1  
 statistics: GraphPad Prism 9  
 microCT: SkyScan 1272 Control Software v1.5  
 flow cytometry: BD FACSCanto II system software v3.0

Data analysis

microCT: CT Analyzer 1.16.4.1, 3D Visualization software v2.3.2.0  
 statistics: GraphPad Prism 9  
 graphs: GraphPad Prism 9  
 image analysis: Zeiss AxioVision 4.9.1  
 flow cytometry: Kaluza 2.2.1 software

For manuscripts utilizing custom algorithms or software that are central to the research but not yet described in published literature, software must be made available to editors and reviewers. We strongly encourage code deposition in a community repository (e.g. GitHub). See the Nature Portfolio [guidelines for submitting code & software](#) for further information.

## Data

Policy information about [availability of data](#)

All manuscripts must include a [data availability statement](#). This statement should provide the following information, where applicable:

- Accession codes, unique identifiers, or web links for publicly available datasets
- A description of any restrictions on data availability
- For clinical datasets or third party data, please ensure that the statement adheres to our [policy](#)

Source data are provided with this paper. All other data will be made available from the corresponding author G.C. upon reasonable request. This study did not generate any unique codes.

## Research involving human participants, their data, or biological material

Policy information about studies with [human participants or human data](#). See also policy information about [sex, gender \(identity/presentation\), and sexual orientation](#) and [race, ethnicity and racism](#).

Reporting on sex and gender

Reporting on race, ethnicity, or other socially relevant groupings

Population characteristics

Recruitment

Ethics oversight

Note that full information on the approval of the study protocol must also be provided in the manuscript.

## Field-specific reporting

Please select the one below that is the best fit for your research. If you are not sure, read the appropriate sections before making your selection.

Life sciences  Behavioural & social sciences  Ecological, evolutionary & environmental sciences

For a reference copy of the document with all sections, see [nature.com/documents/nr-reporting-summary-flat.pdf](https://www.nature.com/documents/nr-reporting-summary-flat.pdf)

## Life sciences study design

All studies must disclose on these points even when the disclosure is negative.

Sample size

Data exclusions

Replication

Randomization

Blinding

## Reporting for specific materials, systems and methods

We require information from authors about some types of materials, experimental systems and methods used in many studies. Here, indicate whether each material, system or method listed is relevant to your study. If you are not sure if a list item applies to your research, read the appropriate section before selecting a response.

## Materials & experimental systems

| n/a                                 | Involved in the study                                           |
|-------------------------------------|-----------------------------------------------------------------|
| <input type="checkbox"/>            | <input checked="" type="checkbox"/> Antibodies                  |
| <input checked="" type="checkbox"/> | <input type="checkbox"/> Eukaryotic cell lines                  |
| <input checked="" type="checkbox"/> | <input type="checkbox"/> Palaeontology and archaeology          |
| <input type="checkbox"/>            | <input checked="" type="checkbox"/> Animals and other organisms |
| <input checked="" type="checkbox"/> | <input type="checkbox"/> Clinical data                          |
| <input checked="" type="checkbox"/> | <input type="checkbox"/> Dual use research of concern           |
| <input checked="" type="checkbox"/> | <input type="checkbox"/> Plants                                 |

## Methods

| n/a                                 | Involved in the study                              |
|-------------------------------------|----------------------------------------------------|
| <input checked="" type="checkbox"/> | <input type="checkbox"/> ChIP-seq                  |
| <input type="checkbox"/>            | <input checked="" type="checkbox"/> Flow cytometry |
| <input checked="" type="checkbox"/> | <input type="checkbox"/> MRI-based neuroimaging    |

## Antibodies

### Antibodies used

Primary antibodies for Western blot analysis:  
 C-MYC (Cell Signaling Technologies): #5605 (D84C12, Rabbit); 1/1000 dilution  
 NFATc1 (Santa Cruz Biotechnologies): sc-7294 (7A6, Mouse); 1/1000 dilution  
 PHGDH (Cell Signaling Technologies): #66350 (D8F3O, Rabbit); 1/1000 dilution  
 PSAT1 (Bio-Techne): NBP1-55368 (TL2687305A, Rabbit); 1/1000 dilution  
 H3K4Me3 (Cell Signaling Technologies): #9751 (C42D8, Rabbit); 1/1000 dilution  
 H3K9Me3 (Cell Signaling Technologies): #13969 (D4W1U, Rabbit); 1/1000 dilution  
 H3K27Me3 (Cell Signaling Technologies): #9733 (C36B11, Rabbit); 1/1000 dilution  
 H3K36Me3 (Cell Signaling Technologies): #4909 (D5A7, Rabbit); 1/1000 dilution  
 H3K79Me3 (Cell Signaling Technologies): #74073 (E8B3M, Rabbit); 1/1000 dilution  
 H3 (Cell Signaling Technologies): #14269 (1B1B2, Mouse); 1/1000 dilution  
 beta-actin (Sigma-Aldrich): A5441 (lot 026M, Mouse); 1/10.000 dilution  
 Lamin A/C (Santa Cruz Biotechnologies): sc-376248 (lot C1413, Mouse); 1/1000 dilution

Secondary antibodies for Western blot analysis:  
 anti-mouse HRP conjugated (Dako): P0161 (lot 00095192, Rabbit); 1/2500 dilution  
 anti-rabbit HRP conjugated (Dako): P0448 (lot 00094764, Goat); 1/2500 dilution

Primary antibody for immunohistochemical analysis:  
 PHGDH (Cell Signaling Technologies): #66350 (D8F3O, Rabbit); 1/50 dilution

Secondary antibody for immunohistochemical analysis:  
 anti-rabbit Alexa-fluor 488 (Invitrogen): #A-11034 (lot 1937195, Goat); 1/100 dilution

Antibodies for flow cytometry analysis:  
 APC-CD11b (#101211; clone M1/70; BioLegend); 1/100 dilution  
 FITC-Gr-1 (#108405; clone RB6-8C5; BioLegend); 1/100 dilution  
 FITC-F4/80 (#123107; clone BM8; BioLegend); 1/100 dilution  
 PE-CD115 (#165203; clone W19330E; BioLegend); 1/100 dilution  
 PerCP-CD19 (#115531; clone 6D5; BioLegend); 1/100 dilution

### Validation

All antibodies were obtained from indicated commercial vendors with ensured quality and have been used in multiple experiments to detect intended proteins in control samples with expected molecular weight to validate their effectiveness in our study. As additional validation, we performed shRNA-mediated knockdown of several genes in vitro.

Antibodies for Western blot/immunohistochemistry:  
 C-MYC (Cell Signaling Technologies; #5605; D84C12, Rabbit): validated by the manufacturer on HEK293, HeLa, and Raji cells with 888 citations  
 NFATc1 (Santa Cruz Biotechnologies; sc-7294; 7A6, Mouse): validated by the manufacturer on Raji, Ramos, GA-10, and U-698 with 9 citations  
 PHGDH (Cell Signaling Technologies; #66350; D8F3O, Rabbit): validated by the manufacturer on HeLa, HT-29, HCT116, and MCF7 cells with 13 citations  
 PSAT1 (Bio-Techne; NBP1-55368; TL2687305A, Rabbit): validated by the manufacturer on human fetal kidney, and Hep2G cells with 1 citation  
 H3K4Me3 (Cell Signaling Technologies; #9751; C42D8, Rabbit): validated by the manufacturer on HeLa, and NIH/3T3 cells with 515 citations  
 H3K9Me3 (Cell Signaling Technologies; #13969; D4W1U, Rabbit): validated by the manufacturer on HeLa, and NIH/3T3 cells with 127 citations  
 H3K27Me3 (Cell Signaling Technologies; #9733; C36B11, Rabbit): validated by the manufacturer on HCT116, NIH/3T3, C6, COS, and NIH/3T3 cells with 1151 citations  
 H3K36Me3 (Cell Signaling Technologies; #4909; D5A7, Rabbit): validated by the manufacturer on HeLa, C2C12, C6, and COS cells with 103 citations  
 H3K79Me3 (Cell Signaling Technologies; #74073; E8B3M, Rabbit): validated by the manufacturer on HeLa, C2C12, C6, and COS-7 cells with 7 citations  
 H3 (Cell Signaling Technologies; #14269; 1B1B2, Mouse): validated by the manufacturer on HeLa, NIH/3T3, C6, and COS-7 cells with

150 citations

beta-actin (Sigma-Aldrich; A5441; lot 026M, Mouse): validated by the manufacturer on HeLa, JURKAT, NIH/3T3, PC12, RAT2, CHO, MDBK, MDCK, and COS-7 cells with 10021 citations

Lamin A/C (Santa Cruz Biotechnologies; sc-376248; lot C1413, Mouse): validated by the manufacturer on HeLa, C32, NIH/3T3, PC-3, A-431, and Sol8 cells with 229 citations

Antibodies for flow cytometry analysis:

APC-CD11b (#101211; clone M1/70; BioLegend): validated by the manufacturer using C57BL/6 mouse bone marrow cells with 356 citations

FITC-Gr-1 (#108405; clone RB6-8C5; BioLegend): validated by the manufacturer using C57BL/6 mouse bone marrow cells with 127 citations

FITC-F4/80 (#123107; clone BM8; BioLegend): validated by the manufacturer using Balb/c mouse peritoneal macrophages with 207 citations

PE-CD115 (#165203; clone W19330E; BioLegend): validated by the manufacturer using Balb/c mouse peritoneal macrophages with 0 citations

PerCP-CD19 (#115531; clone 6D5; BioLegend): validated by the manufacturer using mouse splenocytes with 17 citations

## Animals and other research organisms

Policy information about [studies involving animals](#); [ARRIVE guidelines](#) recommended for reporting animal research, and [Sex and Gender in Research](#)

### Laboratory animals

All mice that were used in this study were on a C57BL/6J genetic background. Osteoclast-specific PHGDH-deficient mice were generated by crossing Phgdh-floxed mice (Yoshida K, J Biol Chem 2004) with transgenic mice expressing the Cre recombinase under the control of the Lysozyme M gene promoter (Clausen BE, Transgenic Res 1999). Wild-type littermates (Phgdh-floxed mice without expression of the Cre recombinase) were used as control. All mice were individually genotyped and correct excision of floxed alleles was determined. Mouse phenotyping was performed on 8-week-old mice. All colonies were housed and bred in individually ventilated cages in the animal facility of the KU Leuven (at 18-23°C and 40-60% humidity with a 12 hours light-dark cycle).

### Wild animals

This study did not use wild animals.

### Reporting on sex

The in vivo impact of Phgdh deletion in osteoclasts was confirmed both in male and female mice. Specifically, mouse phenotyping was performed in 9 wild-type and 7 conditional knockout male mice (microCT and histological analysis), and 6 wild-type and 9 conditional knockout female mice (microCT analysis). For pharmacological PHGDH inhibition, we used either male mice (vehicle/NCT-503; n=5) or sham-operated/ovariectomized female mice (vehicle/NCT-503; n=6). All in vivo experiments, regardless of sex, consistently indicate that inactivation of PHGDH results in decreased osteoclast-mediated bone resorption and consequently increased bone mass.

### Field-collected samples

This study did not include field-collected samples.

### Ethics oversight

All experimental procedures were approved by the Institutional Animal Care and Research Advisory Committee of the KU Leuven (protocol number P140/2020).

Note that full information on the approval of the study protocol must also be provided in the manuscript.

## Flow Cytometry

### Plots

Confirm that:

- The axis labels state the marker and fluorochrome used (e.g. CD4-FITC).
- The axis scales are clearly visible. Include numbers along axes only for bottom left plot of group (a 'group' is an analysis of identical markers).
- All plots are contour plots with outliers or pseudocolor plots.
- A numerical value for number of cells or percentage (with statistics) is provided.

### Methodology

#### Sample preparation

Bone marrow myeloid cells were obtained by flushing tibiae and femurs with glutaMAX-1 aMEM, supplemented with 100 units/ml penicillin, 50 µg/ml streptomycin and 10% fetal bovine serum, and enriched for CD45 expression using CD45 MicroBeads (Miltenyi Biotec) and magnetic-activated cell sorting according to the manufacturer's instructions. Cells were spun down and labeled with the following antibodies for 45 minutes at 4°C: APC-CD11b (#101211, BioLegend), FITC-Gr-1 (#108405, BioLegend), FITC-F4/80 (#123107, BioLegend), PE-CD115 (#565249, BioLegend) and PerCP-CD19 (#115531, BioLegend).

#### Instrument

BD Canto II HTS

#### Software

Data acquisition: BD FACSCanto II system software v3.0  
Data analysis: Kaluza 2.2.1 software

Cell population abundance

Post-sort purity was not determined

Gating strategy

Gating strategy is provided as Extended Data Fig. 3m. Gates were determined based on single-label beads (AbC Total Antibody Compensation Bead Kit; FisherScientific) and negative controls (non-labeled beads).

Tick this box to confirm that a figure exemplifying the gating strategy is provided in the Supplementary Information.
