# Supplementary material for: The serine synthesis pathway drives osteoclast differentiation through epigenetic regulation of NFATc1 expression
Source: PubMed Central journal article supplement (PMC10822776; doi:10.1038/s42255-023-00948-y), 2024-01-10

Fig. 1k-l

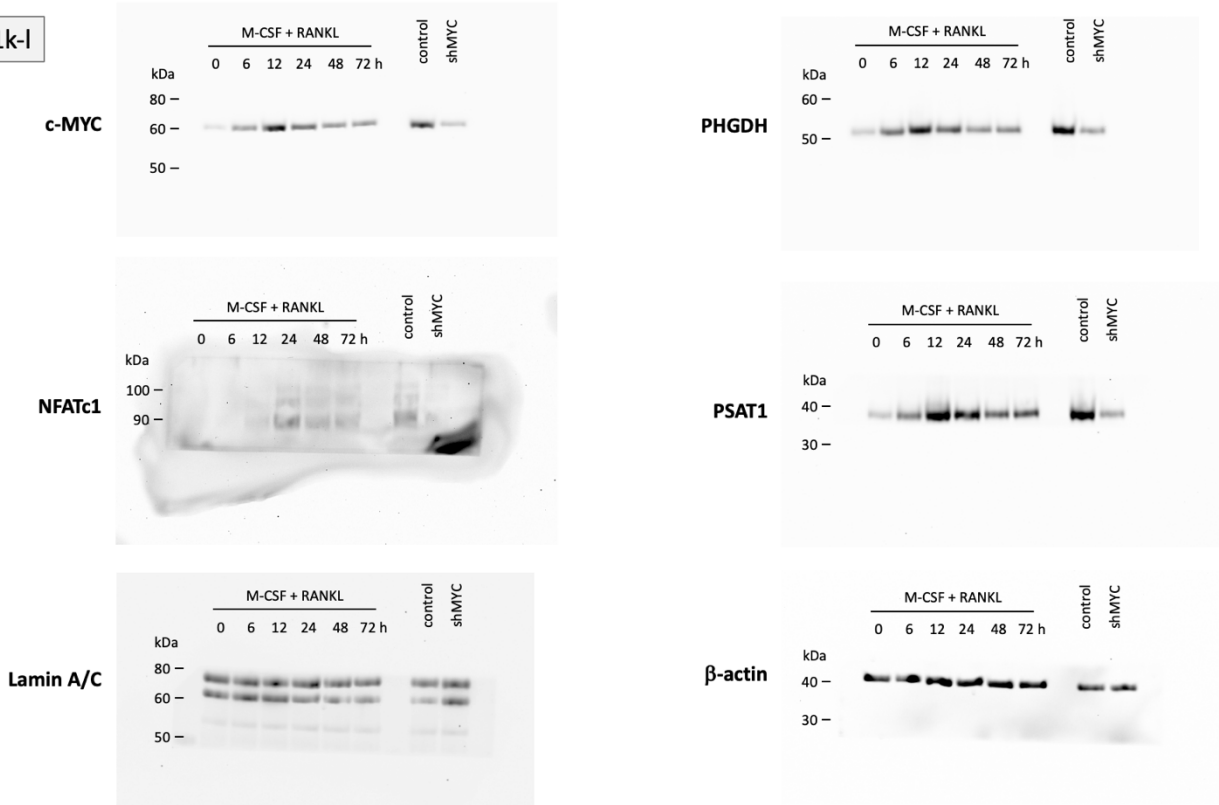

Fig. 5f

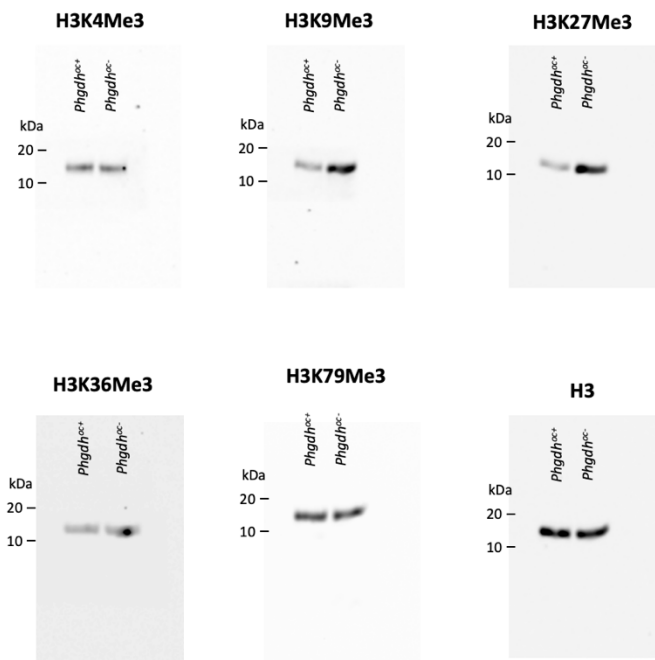

Fig. 5h

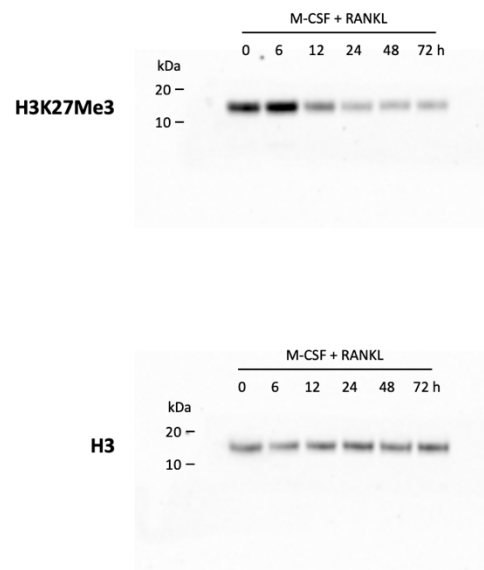

Fig. 5i

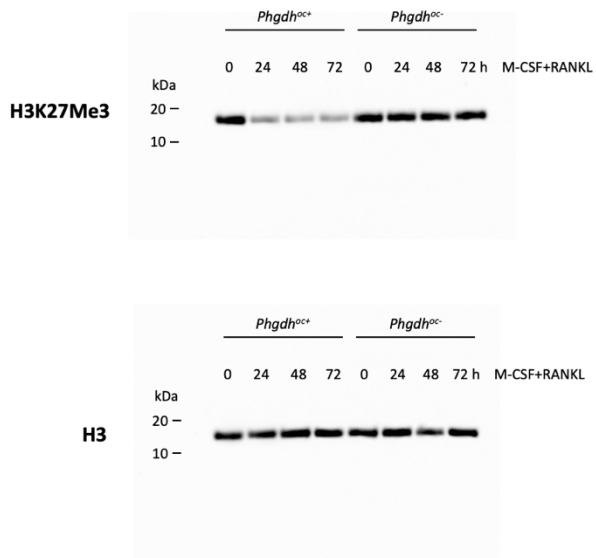

Fig. 5j

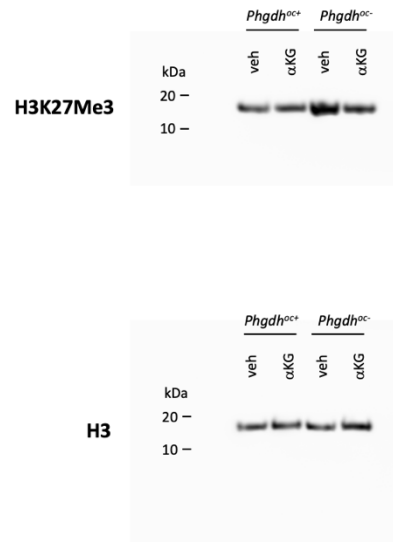

Extended Data Fig. 3b

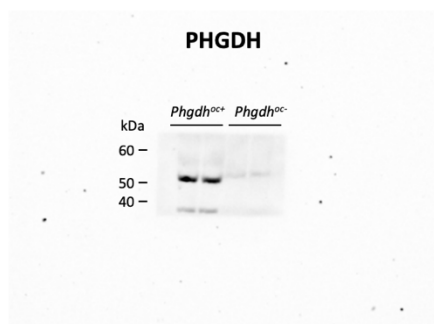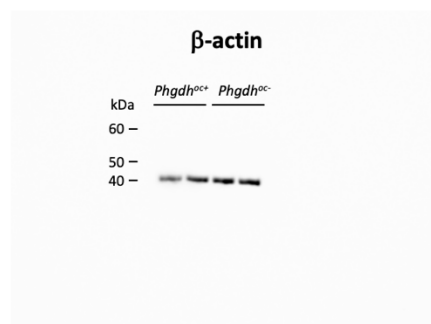

Supplement: 42255_2023_948_MOESM20_ESM.pdf [file 42255_2023_948_MOESM20_ESM.pdf]
